# Supplementary material for: Atomistic level molecular dynamics simulation on the solubilization mechanism of aromatic molecules in anionic micelles
Source: Royal Society of Chemistry journal article supplement (doi:10.1039/c5ra20855f), 2015-01-01
Supplement: c5ra20855f1.pdf [file c5ra20855f1.pdf]

Supplementary figure

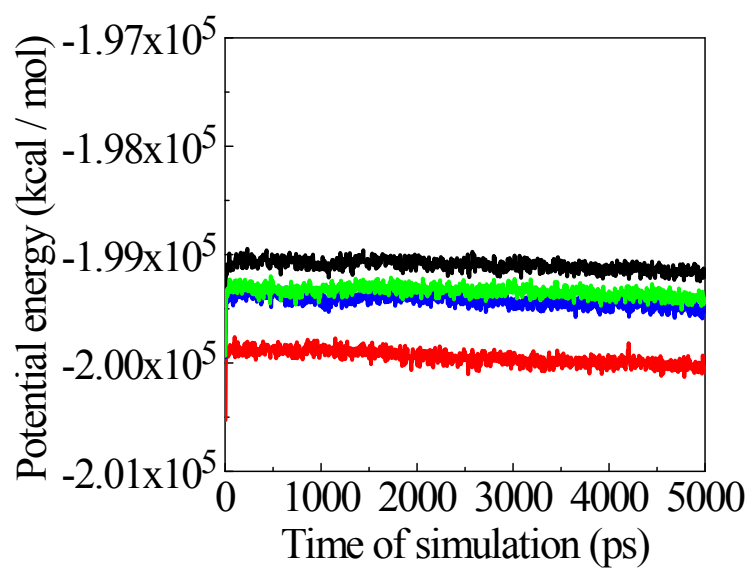

Fig. S1: Variation of the potential energy of the system with time of dynamic simulation.
